# Supplementary material for: The PPP1R15 Family of eIF2-alpha Phosphatase Targeting Subunits (GADD34 and CReP)
Source: MDPI journal article supplement (doi:10.3390/ijms242417321), 2023-12-10
Supplement: s1 [file s1]

**GADD34 Binding Proteins**

| Protein                                          | Identification Technique                             | Reference |
|--------------------------------------------------|------------------------------------------------------|-----------|
| PP1CA                                            | Affinity purification; Mass Spectrometry             | 150       |
| PP1CB                                            | Affinity purification; Mass Spectrometry             | 150       |
| PP1CC                                            | Affinity purification; Mass Spectrometry             | 150       |
| HSPA8                                            | Affinity purification; Mass Spectrometry             | 150       |
| HSPA1A                                           | Affinity purification; Mass Spectrometry             | 150       |
| HSPA2                                            | Affinity purification; Mass Spectrometry             | 150       |
| HSPA6                                            | Affinity purification; Mass Spectrometry             | 150       |
| ACTB                                             | Affinity purification; Mass Spectrometry             | 150       |
| ACTG1                                            | Affinity purification; Mass Spectrometry             | 150       |
| ACTBL2                                           | Affinity purification; Mass Spectrometry             | 150       |
| ACTA2                                            | Affinity purification; Mass Spectrometry             | 150       |
| TUBB                                             | Affinity purification; Mass Spectrometry             | 150       |
| TUBB4B                                           | Affinity purification; Mass Spectrometry             | 150       |
| TUBB2A                                           | Affinity purification; Mass Spectrometry             | 150       |
| TUBB6                                            | Affinity purification; Mass Spectrometry             | 150       |
| TUBB4A                                           | Affinity purification; Mass Spectrometry             | 150       |
| TUBA1C                                           | Affinity purification; Mass Spectrometry             | 150       |
| TUBA1B                                           | Affinity purification; Mass Spectrometry             | 150       |
| TUBA4A                                           | Affinity purification; Mass Spectrometry             | 150       |
| HADHB                                            | Affinity purification; Mass Spectrometry             | 150       |
| HADHA                                            | Affinity purification; Mass Spectrometry             | 150       |
| PRKDC                                            | Affinity purification; Mass Spectrometry             | 150       |
| EIF2S1                                           | Affinity purification; Mass Spectrometry             | 150       |
| EIF2S2                                           | Affinity purification; Mass Spectrometry             | 150       |
| EIF2S3                                           | Affinity purification; Mass Spectrometry             | 150       |
| InsIR54                                          | Affinity purification; Mass Spectrometry             | 150       |
| DYNC1H1                                          | Affinity purification; Mass Spectrometry             | 150       |
| EEF1A1                                           | Affinity purification; Mass Spectrometry             | 150       |
| AIFM1                                            | Affinity purification; Mass Spectrometry             | 150       |
| CAD                                              | Affinity purification; Mass Spectrometry             | 150       |
| SMC2                                             | Affinity purification; Mass Spectrometry             | 150       |
| DNAJA1                                           | Affinity purification; Mass Spectrometry             | 150       |
| TCP1                                             | Affinity purification; Mass Spectrometry             | 150       |
| TCP1beta                                         | Affinity purification; Mass Spectrometry             | 150       |
| Translin                                         | Yeast two-hybrid; In vitro binding assay             | 178       |
| Leukemic HRX Proteins -HRX-ENL; HRX-AF9; HRX-ELL | Yeast two hybrid; co-immunoprecipitation             | 172       |
| Human SNF5/INI1 protein                          | Co-immunoprecipitation assay; in vitro binding assay | 172       |
| KIF3A (part of the Kinesin superfamily)          | Yeast two-hybrid assay; In vitro binding assay       | 176       |
| Src-related protein tyrosine kinase Lyn          | Yeast two-hybrid; co-immunoprecipitation             | 174       |
| Inhibitor 1 (ppp1r1a)                            | Yeast two-hybrid; co-immunoprecipitation             | 15        |
| BFCOL1                                           | Yeast two-hybrid; In vitro binding assay             | 180       |
| Smad7                                            | Yeast two-hybrid; co-immunoprecipitation             | 182       |
| PTPN2                                            | Mass-spectrometry; substrate-trapping studies        | 168       |
| CUEDC2 (CUE domain-containing protein 2)         | Yeast two-hybrid; co-immunoprecipitation             | 183       |
| casein kinase-1ε (CK1ε)                          | co-immunoprecipitation                               | 160       |
| TDP-43                                           | co-immunoprecipitation                               | 160       |
| SIRT1                                            | co-immunoprecipitation                               | 169       |
| COP55                                            | Affinity purification; Mass Spectrometry             | 181       |
| WDR95                                            | Affinity purification; Mass Spectrometry             | 181       |
| Caprin1                                          | Affinity purification; Mass Spectrometry             | 181       |
| G3BP1                                            | Affinity purification; Mass Spectrometry             | 181       |
| Hsp40                                            | Yeast two hybrid; co-immunoprecipitation             | 177       |
| Bag1                                             | Yeast two hybrid; co-immunoprecipitation             | 171       |
| G34BP                                            | Yeast two hybrid; co-immunoprecipitation             | 179       |
| TSC1/TSC2                                        | Co-immunoprecipitation                               | 186       |

**CREP Binding Proteins**

| Protein | Identification Technique                 | Reference |
|---------|------------------------------------------|-----------|
| PP1CA   | Affinity purification; Mass Spectrometry | 150       |
| PP1CB   | Affinity purification; Mass Spectrometry | 150       |
| PP1CC   | Affinity purification; Mass Spectrometry | 150       |
| HSPA8   | Affinity purification; Mass Spectrometry | 150       |
| HSPA1A  | Affinity purification; Mass Spectrometry | 150       |
| HSPA2   | Affinity purification; Mass Spectrometry | 150       |
| HSPA6   | Affinity purification; Mass Spectrometry | 150       |
| ACTB    | Affinity purification; Mass Spectrometry | 150       |
| ACTG1   | Affinity purification; Mass Spectrometry | 150       |
| ACTBL2  | Affinity purification; Mass Spectrometry | 150       |
| ACTA2   | Affinity purification; Mass Spectrometry | 150       |
| TUBB    | Affinity purification; Mass Spectrometry | 150       |
| TUBB4B  | Affinity purification; Mass Spectrometry | 150       |
| TUBB2A  | Affinity purification; Mass Spectrometry | 150       |
| TUBB6   | Affinity purification; Mass Spectrometry | 150       |
| TUBB4A  | Affinity purification; Mass Spectrometry | 150       |
| TUBA1C  | Affinity purification; Mass Spectrometry | 150       |
| TUBA1B  | Affinity purification; Mass Spectrometry | 150       |
| TUBA4A  | Affinity purification; Mass Spectrometry | 150       |
| HADHB   | Affinity purification; Mass Spectrometry | 150       |
| HADHA   | Affinity purification; Mass Spectrometry | 150       |
| PRKDC   | Affinity purification; Mass Spectrometry | 150       |
| EIF2S1  | Affinity purification; Mass Spectrometry | 150       |
| EIF2S2  | Affinity purification; Mass Spectrometry | 150       |
| EIF2S3  | Affinity purification; Mass Spectrometry | 150       |
| InsIR54 | Affinity purification; Mass Spectrometry | 150       |
| DYNC1H1 | Affinity purification; Mass Spectrometry | 150       |
| EEF1A1  | Affinity purification; Mass Spectrometry | 150       |
